# Supplementary material for: Materials process informatics-assisted precise particle size control of metal–organic frameworks
Source: Royal Society of Chemistry journal article supplement (doi:10.1039/d6sc03212e), 2026-06-20
Supplement: d6sc03212e1.pdf [file d6sc03212e1.pdf]

## Supporting Information

### Materials Process Informatics-Assisted Precise Particle Size Control of Metal-Organic Framework

Yuan Wang,<sup>ab</sup> Heng Liu,<sup>c</sup> Yusuke Hashimoto,<sup>d</sup> Kazuyuki Iwase,<sup>a</sup> Hao Li <sup>\*c</sup> and Takaaki Tomai <sup>\*ad</sup>

<sup>a</sup> Institute of Multidisciplinary Research for Advanced Materials, Tohoku University, 2-1-1 Katahira, Aoba-ku, Sendai, 980-8577, Japan

<sup>b</sup> Graduate School of Engineering, Tohoku University, 6-6-11 Aramaki-aza Aoba, Aoba-ku, Sendai, 980-8579, Japan

<sup>c</sup> Advanced Institute for Materials Research (WPI-AIMR), Tohoku University, Sendai, 980-8577, Japan

<sup>d</sup> Frontier Research Institute for Interdisciplinary Sciences, Tohoku University, Sendai, 980-8577, Japan

\*Corresponding author

## Details of the automated synthesis system

Experimental validations were conducted using a custom-developed automated synthesis system. The platform integrates two robotic arms, two electronic pipettes, and an electronic balance, all of which are centrally controlled via Python-based programming to enable fully automated operation. Precise control over the dispensing speed and volume of the electronic pipettes, together with highly reproducible positional control provided by the robotic arms, ensures consistent reagent handling and minimizes human-induced variability. As a result, the automated system significantly improves experimental reproducibility and throughput, while enabling efficient and reliable execution of large sets of synthesis experiments.

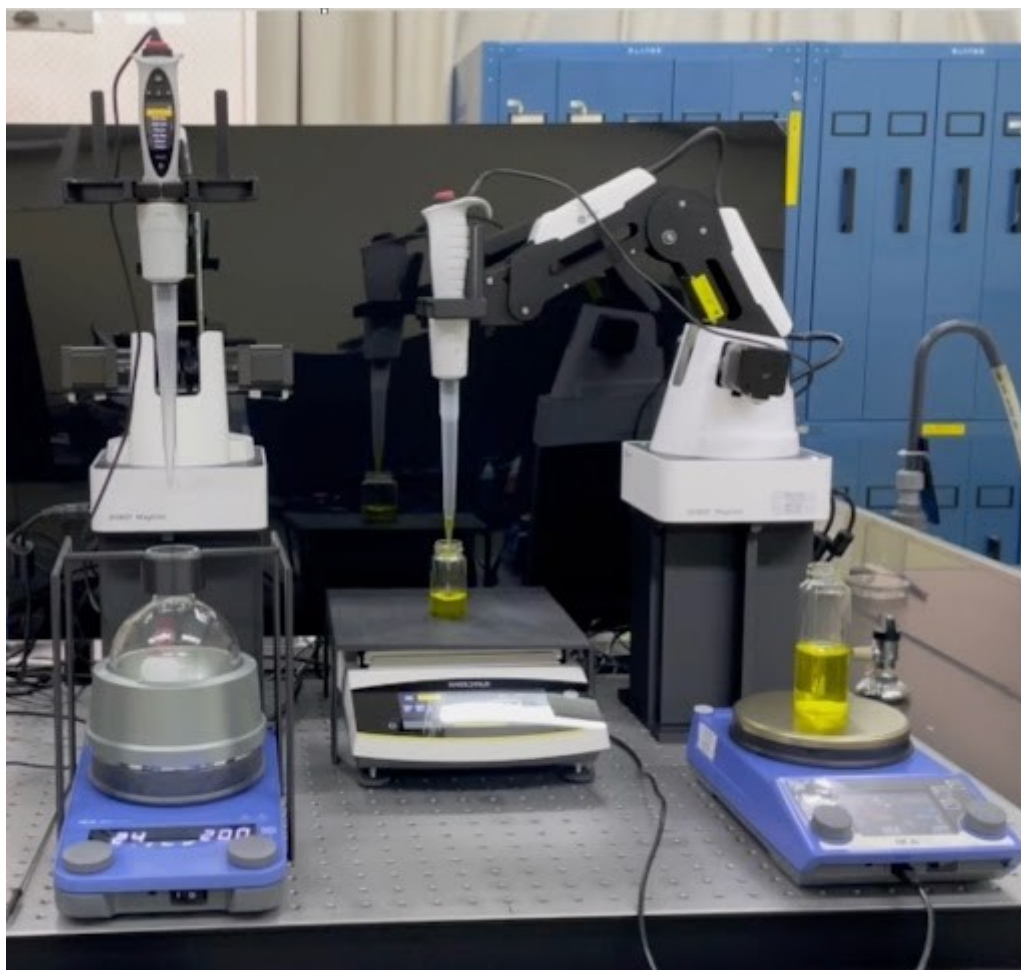

**Fig. S1** Photograph of the custom-developed automated synthesis platform used for experimental validation.

**Table S1.** References included in the curated database.

| Author            | DOI                               | Ref |
|-------------------|-----------------------------------|-----|
| Ahmad (2018)      | 10.1016/j.seppur.2018.06.067      | 1   |
| Ahmadi (2024)     | 10.5812/ijpr-144928               | 2   |
| Aljundi (2017)    | 10.1016/j.desal.2017.06.020       | 3   |
| Armel (2015)      | 10.3390/catal5031333              | 4   |
| Balkanloo (2024)  | 10.1016/j.cej.2024.153835         | 5   |
| Barjasteh (2022)  | 10.1016/j.ijpharm.2022.122339     | 6   |
| Beh (2018)        | 10.1016/j.matchemphys.2018.06.022 | 7   |
| Cao (2023)        | 10.1016/j.desal.2023.116373       | 8   |
| Chang (2010)      | 10.1021/ja1058229                 | 9   |
| Chen (2022)       | 10.1016/j.micromeso.2022.111983   | 10  |
| Chi (2015)        | 10.1016/j.memsci.2015.08.016      | 11  |
| Chin (2018)       | 10.1039/c8ra03459a                | 12  |
| Cho (2018)        | 10.1039/c8ta02797h                | 13  |
| Chowdhuri (2017)  | 10.1088/1361-6528/aa57af          | 14  |
| Cravillon (2009)  | 10.1021/cm900166h                 | 15  |
| Cravillon (2011a) | 10.1002/anie.201102071            | 16  |
| Cravillon (2011b) | 10.1021/cm103571y                 | 17  |
| De (2025)         | 10.1021/acs.molpharmaceut.4c00981 | 18  |
| Demir (2014)      | 10.1016/j.micromeso.2014.07.052   | 19  |
| Ding (2017)       | 10.1016/j.colsurfa.2017.02.012    | 20  |
| Eum (2015)        | 10.1021/jacs.5b00803              | 21  |
| Fan (2015)        | 10.1039/c5ra09981a                | 22  |
| Gao (2019)        | 10.1016/j.desal.2017.06.021       | 23  |
| He (2019)         | 10.1021/acs.inorgchem.9b00288     | 24  |
| Heinz (2023)      | 10.1039/d3qi01007d                | 25  |
| Imae (2022)       | 10.1021/acsanm.2c03793            | 26  |
| Jampa (2020)      | 10.1016/j.eti.2020.100927         | 27  |
| Jana (2024)       | 10.1016/j.colsuc.2024.100030      | 28  |
| Jian (2015)       | 10.1039/c5ra04033g                | 29  |
| Jiang (2013)      | 10.1021/am403079n                 | 30  |
| Jiang (2017)      | 10.1021/acsami.7b04432            | 31  |
| Jiang (2021)      | 10.1021/acsami.0c22910            | 32  |
| Jomekian (2016)   | 10.1016/j.jngse.2016.03.067       | 33  |
| Jomekian (2017)   | 10.1016/j.memsci.2016.11.065      | 34  |
| Karimi (2019)     | 10.1016/j.seppur.2019.115838      | 35  |
| Kawada (2022)     | 10.1039/d2ce00488g                | 36  |
| Khay (2015)       | 10.1039/c5ra02636a                | 37  |
| Kida (2013)       | 10.1039/c2ce26847g                | 38  |

| Author               | DOI                            | Ref |
|----------------------|--------------------------------|-----|
| Kim (2019)           | 10.1016/j.memsci.2019.04.029   | 39  |
| Kim (2024)           | 10.3390/nano14030284           | 40  |
| Kolmykov (2016)      | 10.1016/j.tetlet.2016.11.070   | 41  |
| Kong (2024)          | 10.1016/j.surfcoat.2024.130812 | 42  |
| Kulkarni (2021)      | 10.1016/j.ijbiomac.2021.02.161 | 43  |
| Kumari (2013)        | 10.1021/jp407792a              | 44  |
| Lai (2014)           | 10.1080/02726351.2014.920445   | 45  |
| Lai (2016)           | 10.1002/adfm.201603607         | 46  |
| Lai (2017)           | 10.1021/acscatal.6b02966       | 47  |
| Lee (2015)           | 10.1021/acs.jpcc.5b01519       | 48  |
| Lee (2019a)          | 10.1016/j.jiec.2018.12.039     | 49  |
| Lee (2019b)          | 10.1016/j.memsci.2018.10.015   | 50  |
| Li (2014)            | 10.1021/jp508381m              | 51  |
| Li (2017a)           | 10.1002/slct.201701607         | 52  |
| Li (2017b)           | 10.1039/c6nr08987a             | 53  |
| Li (2018)            | 10.1039/c8nr02288g             | 54  |
| Li (2019)            | 10.1038/s41467-019-10218-9     | 55  |
| Li (2020)            | 10.1246/bcsj.20190298          | 56  |
| Li (2021a)           | 10.1016/j.memsci.2021.119095   | 57  |
| Li (2021b)           | 10.1016/j.seppur.2021.118794   | 58  |
| Li (2022)            | 10.3390/membranes12020122      | 59  |
| Li (2024)            | 10.1002/sml.202406187          | 60  |
| Linder-Patton (2018) | 10.1039/c8ce00746b             | 61  |
| Liu (2013a)          | 10.1039/c3cc45308a             | 62  |
| Liu (2013b)          | 10.1039/c3ta12433a             | 63  |
| Liu (2014)           | 10.1016/j.memsci.2013.09.029   | 64  |
| Liu (2017)           | 10.1039/c6dt04582k             | 65  |
| Luo (2018)           | 10.1002/adma.201704576         | 66  |
| Luo (2019)           | 10.1002/cctc.201900051         | 67  |
| McEwen (2013)        | 10.1016/j.chemphys.2012.12.012 | 68  |
| Mittal (2022)        | 10.1038/s41598-022-14630-y     | 69  |
| Mohammadi (2024)     | 10.1021/acsami.3c15524         | 70  |
| Muñoz-Gil (2019)     | 10.3390/nano9101369            | 71  |
| Nguyen (2023)        | 10.1016/j.jcou.2023.102451     | 72  |
| Nie (2017)           | 10.1149/2.1521713jes           | 73  |
| Pan (2011)           | 10.1039/c0cc05002d             | 74  |
| Pandey (2024)        | 10.1016/j.molstruc.2024.138452 | 75  |
| Patterson (2015)     | 10.1021/jacs.5b00817           | 76  |
| Qin (2023)           | 10.1016/j.ijpharm.2023.123167  | 77  |

| Author                   | DOI                                | Ref |
|--------------------------|------------------------------------|-----|
| Qiu (2022)               | 10.1002/slct.202203273             | 78  |
| Saghir (2021)            | 10.1016/j.materresbull.2021.111372 | 79  |
| Schejn (2014)            | 10.1039/c3ce42485e                 | 80  |
| Schneider (2024)         | 10.1002/celc.202300476             | 81  |
| Seo (2025a)              | 10.1007/s11814-024-00215-0         | 82  |
| Seo (2025b)              | 10.1016/j.jallcom.2025.178578      | 83  |
| Sharma (2020)            | 10.1021/acs.jpcc.0c07194           | 84  |
| Shen (2023)              | 10.1039/d3ce00162h                 | 85  |
| Shi (2016)               | 10.1039/c6tb00104a                 | 86  |
| Si (2020)                | 10.1007/s10853-020-04909-8         | 87  |
| Song (2023)              | 10.1021/acsami.3c02647             | 88  |
| Sánchez-Láinez (2016)    | 10.1016/j.memsci.2016.05.039       | 89  |
| Ta (2018)                | 10.1002/cjce.23155                 | 90  |
| Tanaka (2012)            | 10.1246/cl.2012.1337               | 91  |
| Tanaka (2015)            | 10.1021/acs.jpcc.5b09520           | 92  |
| Thomas (2025)            | 10.1039/d5na00217f                 | 93  |
| Tian (2016)              | 10.1039/c6dt00565a                 | 94  |
| Torad (2013)             | 10.1039/c3cc38955c                 | 95  |
| Tran (2020)              | 10.1016/j.seppur.2019.116026       | 96  |
| Tsai (2016)              | 10.1016/j.micromeso.2015.08.041    | 97  |
| Van Cleuvenbergen (2016) | 10.1021/acs.chemmater.6b01087      | 98  |
| Venna (2010)             | 10.1021/ja109268m                  | 99  |
| Wang (2016)              | 10.1039/c6ta02420c                 | 100 |
| Wang (2017)              | 10.1039/c7cy01725a                 | 101 |
| Wang (2018a)             | 10.1002/adfm.201802596             | 102 |
| Wang (2018b)             | 10.1002/sml.201704282              | 103 |
| Wang (2019)              | 10.1016/j.chemosphere.2019.06.008  | 104 |
| Wang (2023)              | 10.1016/j.apsusc.2022.156181       | 105 |
| Weber (2020)             | 10.1021/acs.cgd.9b01444            | 106 |
| Xue (2024)               | 10.1007/s10904-024-03253-7         | 107 |
| Yahia (2021)             | 10.1016/j.micromeso.2020.110761    | 108 |
| Yang (2017)              | 10.1021/acsami.7b10856             | 109 |
| Yang (2021)              | 10.1016/j.eurpolymj.2020.110212    | 110 |
| Yin (2015)               | 10.1016/j.cej.2014.08.075          | 111 |
| Zhang (2012)             | 10.1021/jz300855a                  | 112 |
| Zhang (2013)             | 10.1021/jz402019d                  | 113 |
| Zhang (2014a)            | 10.1021/ja5084128                  | 114 |
| Zhang (2014b)            | 10.1021/jp5081466                  | 115 |
| Zhang (2014c)            | 10.1039/c4nr00348a                 | 116 |

| Author        | DOI                             | Ref |
|---------------|---------------------------------|-----|
| Zhang (2017)  | 10.1021/acsami.7b05142          | 117 |
| Zhang (2018)  | 10.1007/s10853-018-2049-2       | 118 |
| Zhang (2019a) | 10.1016/j.micromeso.2018.12.035 | 119 |
| Zhang (2019b) | 10.1016/j.micromeso.2019.109568 | 120 |
| Zhang (2025)  | 10.1021/acsapm.5c00612          | 121 |
| Zhao (2015)   | 10.1246/cl.150137               | 122 |
| Zheng (2016)  | 10.1021/jacs.5b11720            | 123 |
| Zhou (2015)   | 10.1039/c5ta00524h              | 124 |
| Zhou (2023)   | 10.1002/elan.202200158          | 125 |
| Zhu (2011)    | 10.1021/cm201701f               | 126 |
| Zhu (2013)    | 10.1016/j.catcom.2012.12.003    | 127 |
| Zhu (2017)    | 10.1038/NMAT4852                | 128 |
| Zhu (2018)    | 10.1021/acsami.8b00072          | 129 |
| Zhu (2024)    | 10.1016/j.seppur.2023.126209    | 130 |

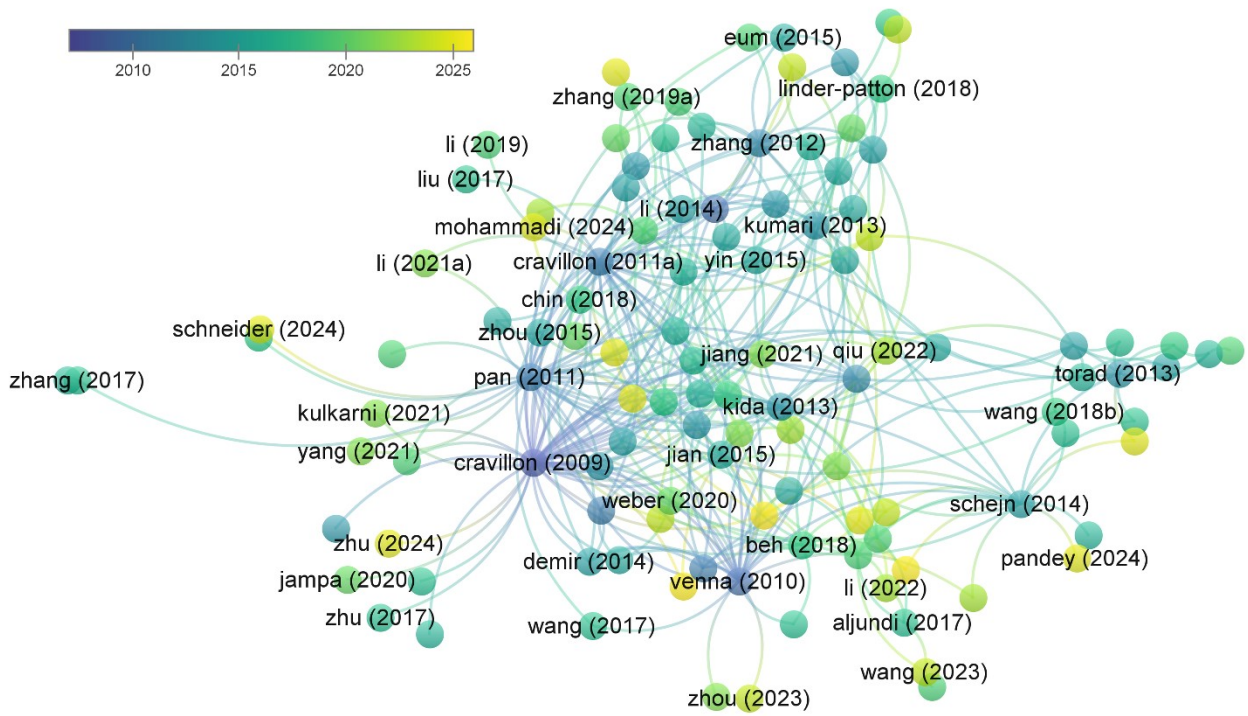

**Fig. S2** Citation network of the literature sources included in the dataset. The connecting lines indicate citation relationships between publications, and the node color represents publication year. The network visualization was generated using VOSviewer<sup>131</sup>.

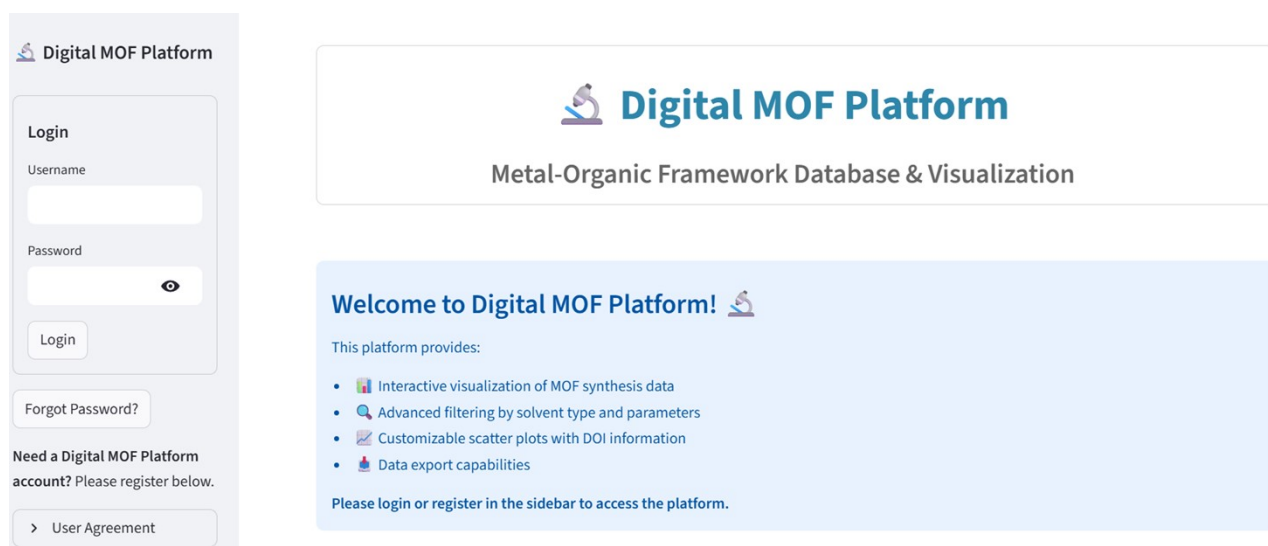

**Fig. S3** Interface of the Digital MOF Platform (DigMOF, <https://www.digmof.org/>) for MOF synthesis data management and visualization.

**Table S2.** The optimal hyperparameters for CB, RF, and XGB models

| <b>CB</b>              | <b>RF</b>             | <b>XGB</b>             |
|------------------------|-----------------------|------------------------|
| iterations = 200       | n_estimators = 150    | n_estimators = 150     |
| learning_rate = 0.04   | max_depth = 12        | colsample_bytree = 0.8 |
| depth = 8              | min_samples_split = 4 | max_depth = 5          |
| l2_leaf_reg = 1.0      | min_samples_leaf = 1  | min_child_weight = 2   |
| bagging_temperature=0  | max_features = 'log2' | reg_alpha = 5          |
| loss_function = 'RMSE' | ccp_alpha=0.0022      | reg_lambda = 5         |
| random_seed = 42       | random_state = 42     | gamma = 0.1            |
| verbose = False        | n_jobs = -1           | subsample = 0.8        |
|                        |                       | learning_rate = 0.07   |
|                        |                       | random_state = 42      |
|                        |                       | n_jobs = -1            |

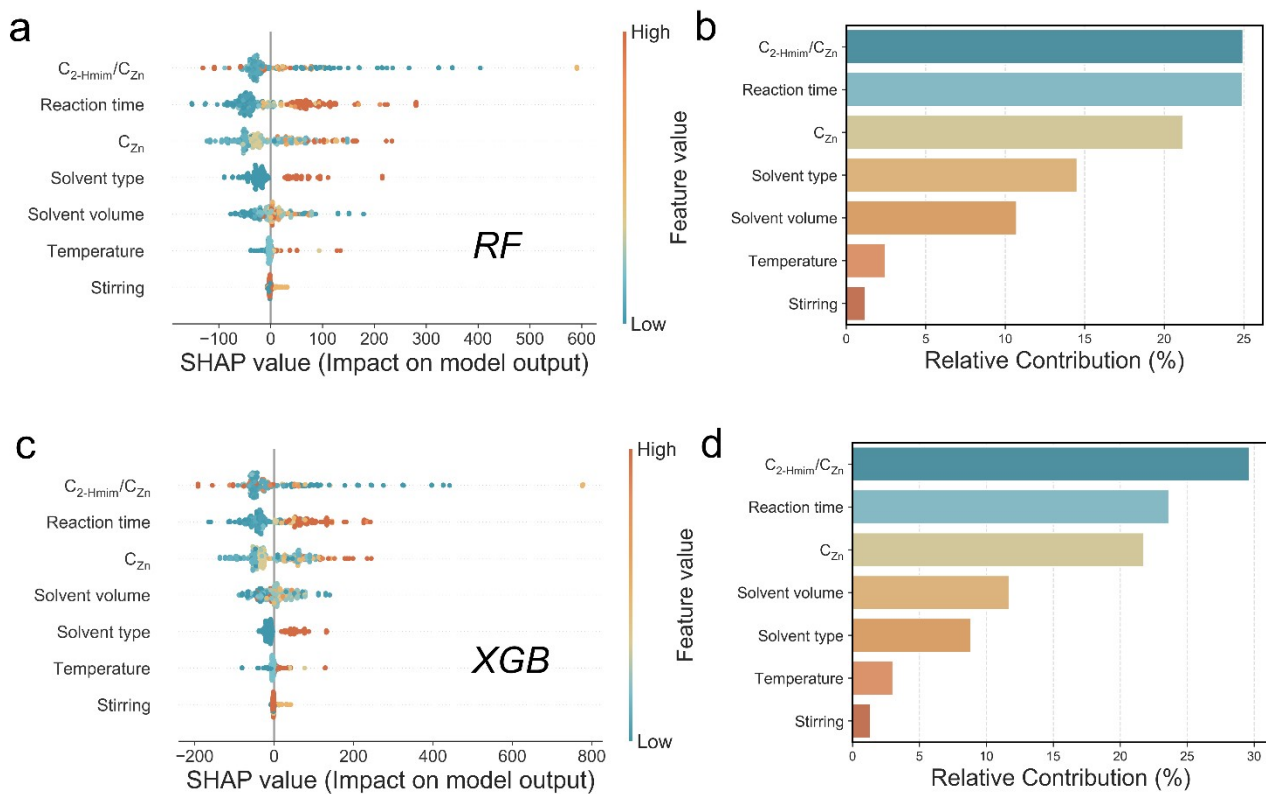

**Fig. S4** SHAP-based feature importance analysis. (a, c) SHAP summary plots showing the distribution of the impact of each feature on the model output for RF and XGB models, respectively. (b, d) Corresponding bar charts representing the relative contribution of synthesis parameters.

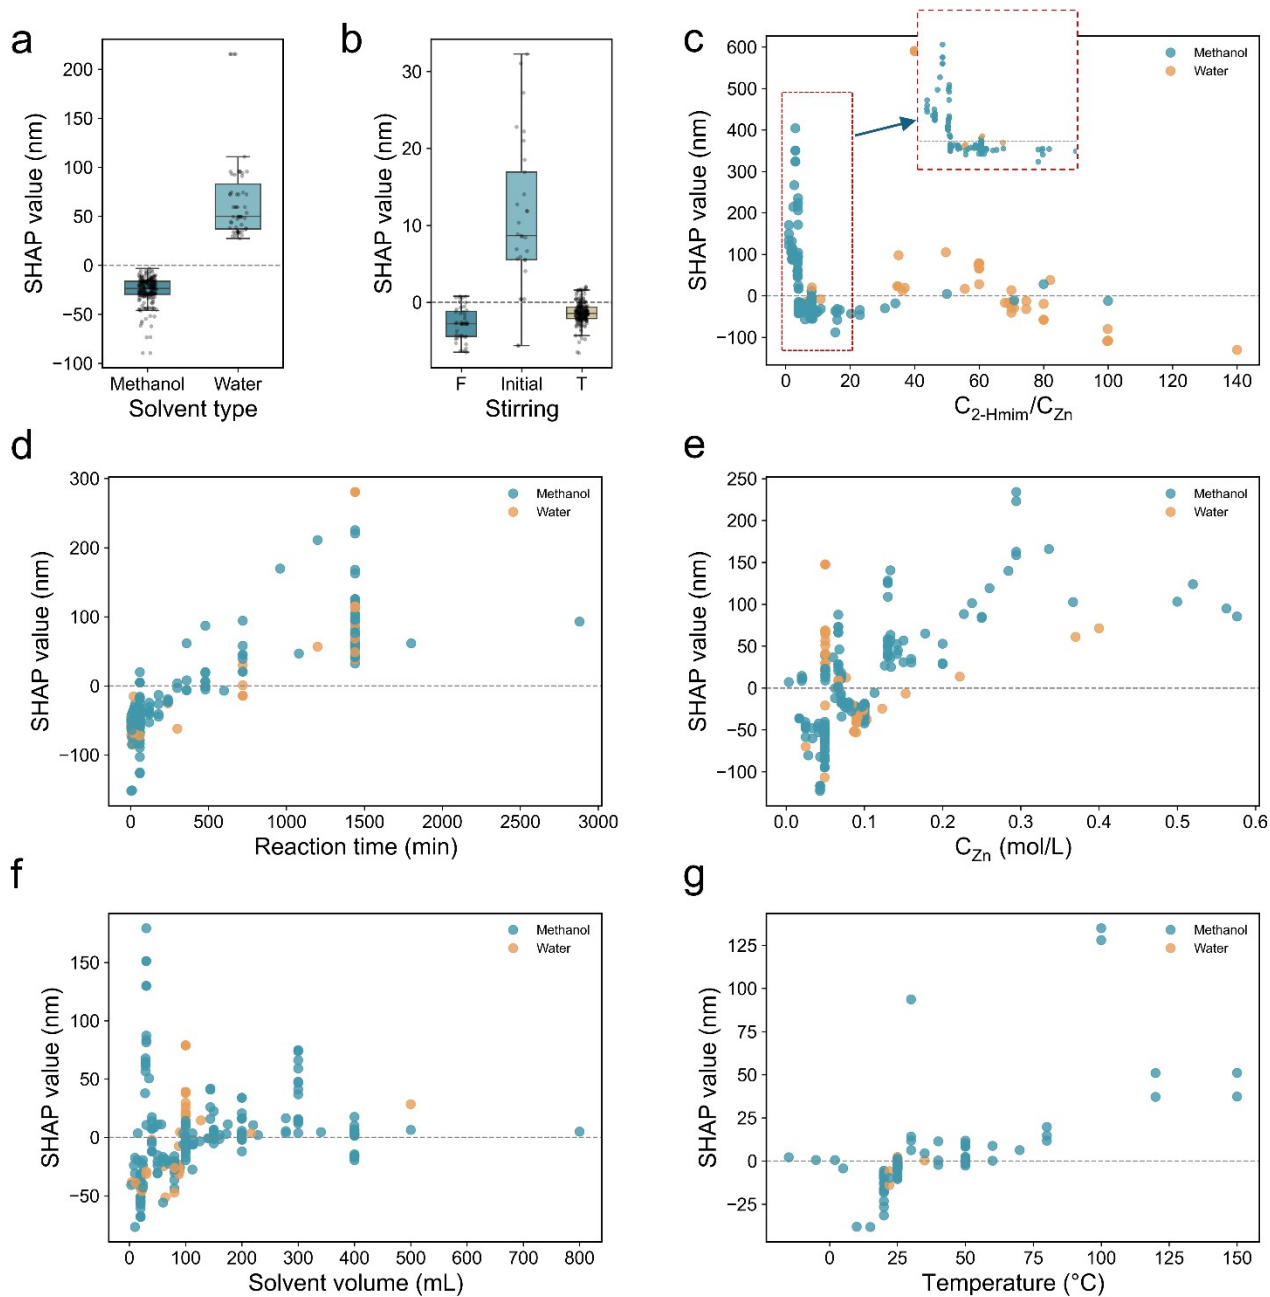

**Fig. S5** SHAP dependence analysis of RF model. (a) solvent type, (b) stirring conditions, (c)  $C_{2-HmIm}/C_{Zn}$ , (d) reaction time, (e)  $C_{Zn}$ , (f) solvent volume, and (g) temperature. Points are colored by solvent type (blue: methanol; orange: water). The inset in (c) provides a magnified view of the low-ratio region (0–20).

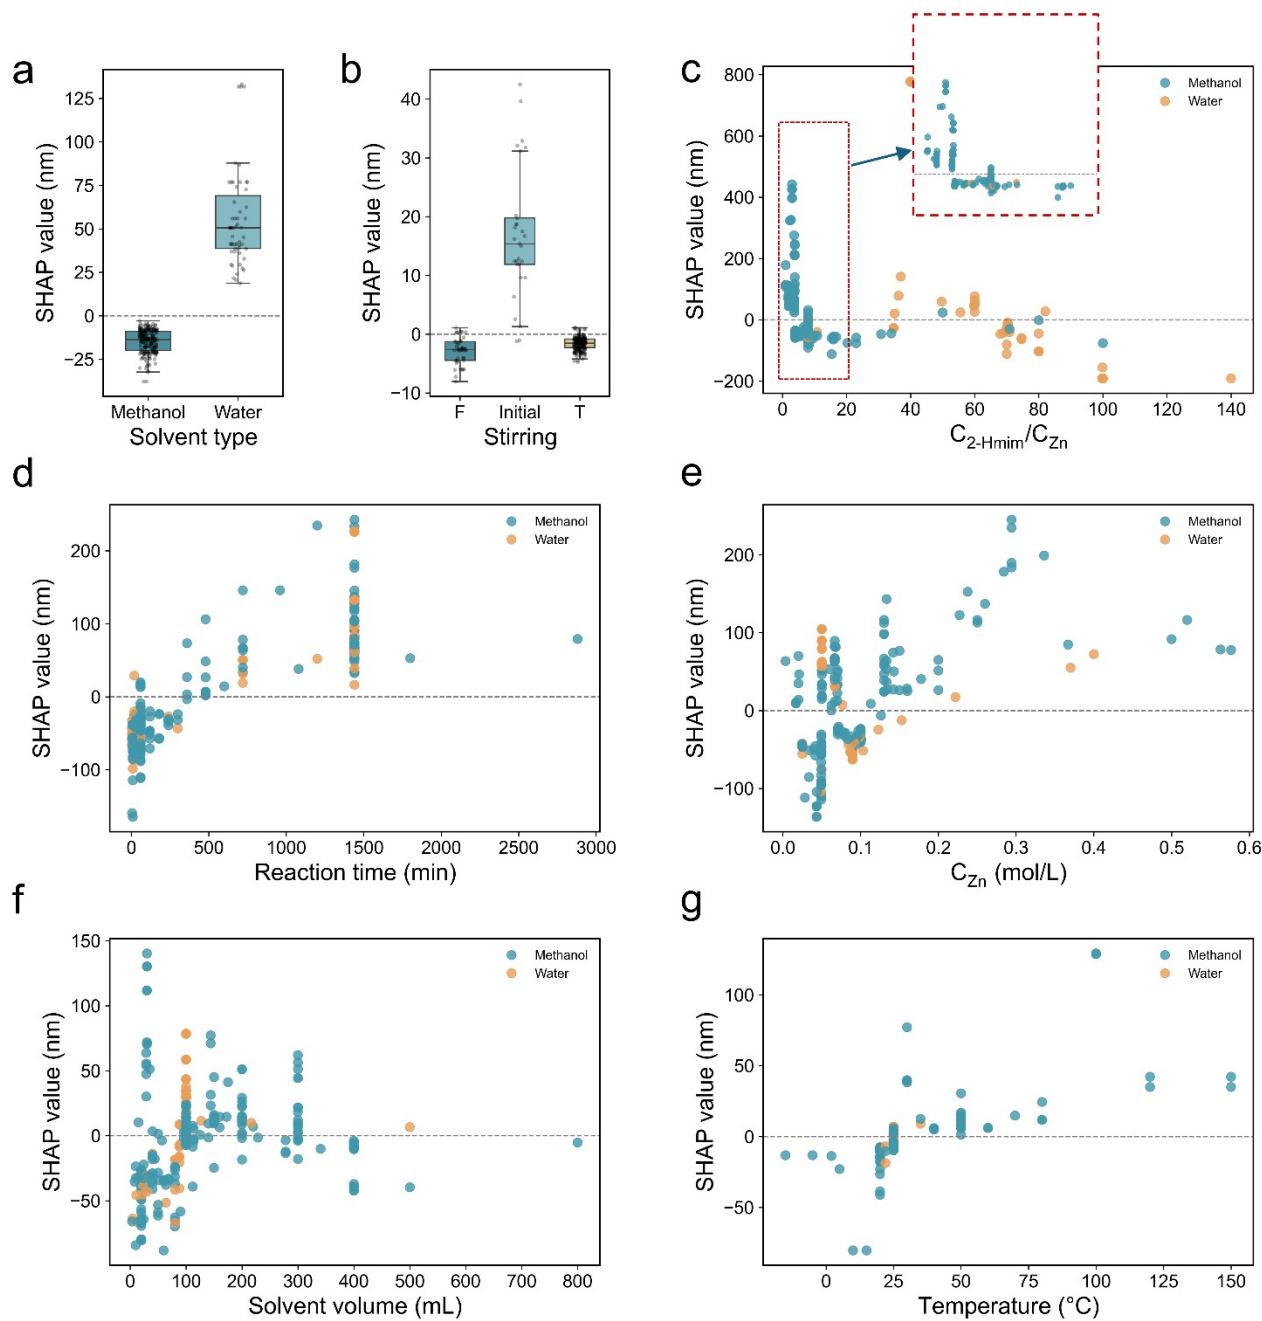

**Fig. S6** SHAP dependence analysis of XGB model. (a) solvent type, (b) stirring conditions, (c)  $C_{2\text{-HmIm}}/C_{\text{Zn}}$ , (d) reaction time, (e)  $C_{\text{Zn}}$ , (f) solvent volume, and (g) temperature. Points are colored by solvent type (blue: methanol; orange: water). The inset in (c) provides a magnified view of the low-ratio region (0–20).

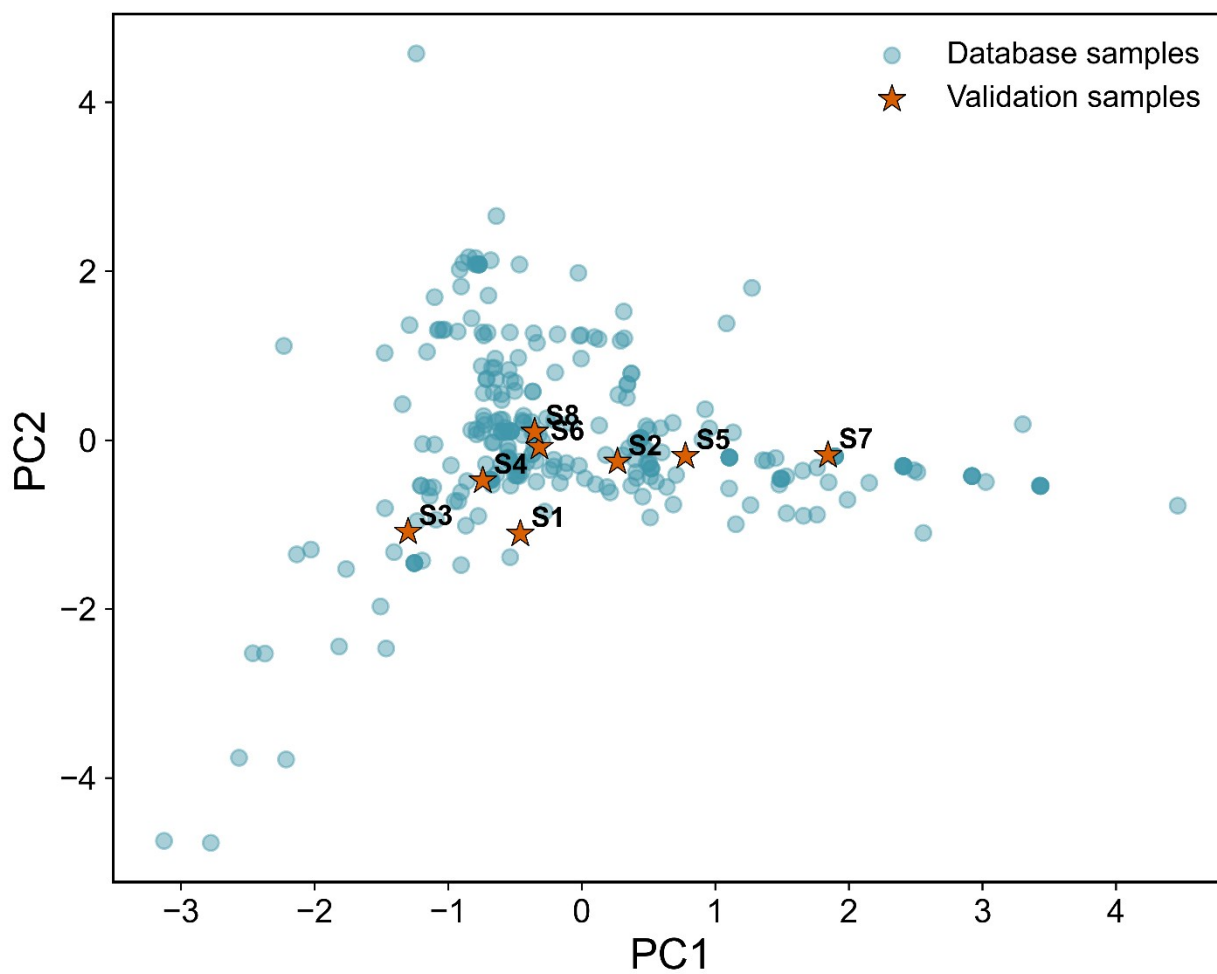

**Fig. S7** Principal component analysis (PCA) of the literature-derived synthesis dataset and experimental validation samples. The blue circles represent the synthesis conditions collected from the literature database, while the orange stars denote the eight experimental validation samples.

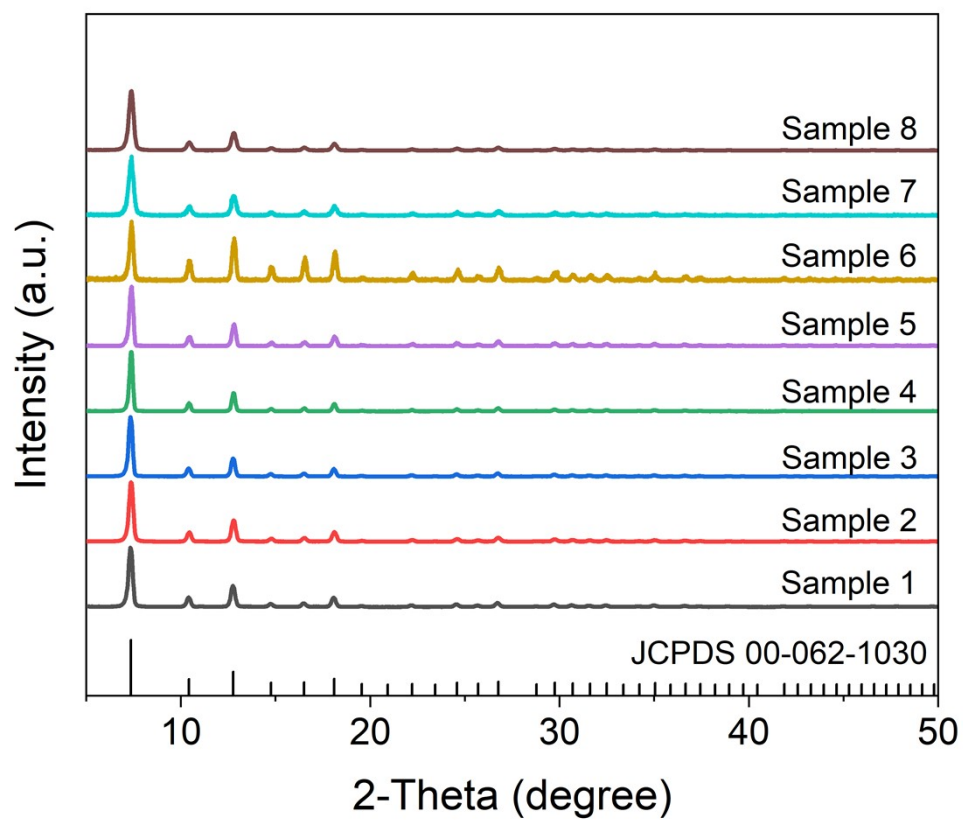

**Fig. S8** Normalized XRD patterns of the prepared ZIF-8 samples in comparison with the standard reference pattern (JCPDS 00-062-1030).

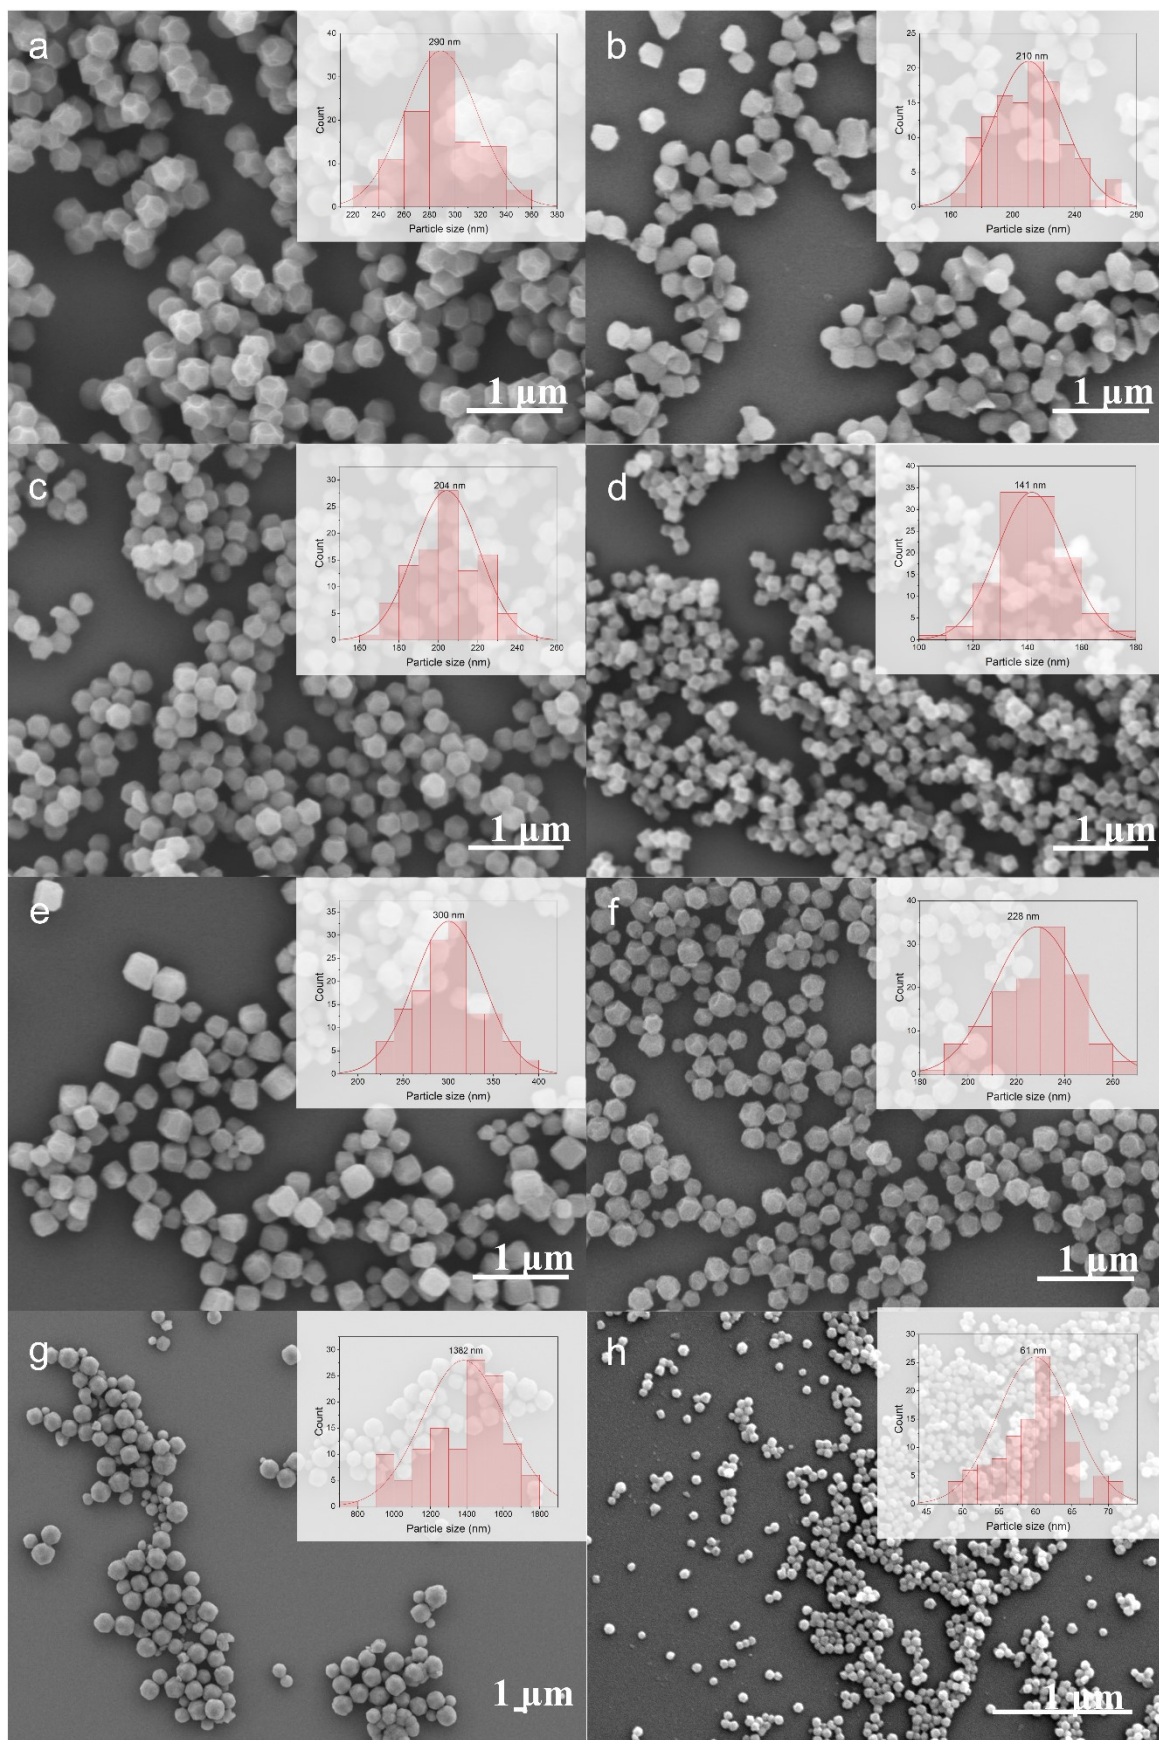

**Fig. S9** SEM images of all validation samples. The insets show the corresponding particle-size distributions obtained from statistical analysis of more than 100 particles for each sample.

## Reference

- 1 M. Ahmad, V. Martin-Gil, V. Perfilov, P. Sysel and V. Fila, *Sep. Purif. Technol.*, 2018, **207**, 523–534.
- 2 M. Ahmadi, E. Asadian, M. Mosayebnia, S. Dadashzadeh, S. Shahhosseini and F. Ghorbani-Bidkorpeh, *Iran. J. Pharm. Res.*, 2024, **23**, 44928.
- 3 I. Aljundi, *Desalination*, 2017, **420**, 12–20.
- 4 V. Armel, J. Hannauer and F. Jaouen, *Catalysts*, 2015, **5**, 1333–1351.
- 5 P. Balkanloo, A. Marjani and M. Mahmoudian, *Chem. Eng. J.*, 2024, **496**, 153835.
- 6 M. Barjasteh, S. Dehnavi, S. Seyedkhani, S. Rahnamaee and M. Golizadeh, *Int. J. Pharm.*, 2022, **629**, 122339.
- 7 J. Beh, J. Lim, E. Ng and B. Ooi, *Mater. Chem. Phys.*, 2018, **216**, 393–401.
- 8 H. Cao, Y. Mao, W. Wang, Y. Jin, Y. Gao, M. Zhang, X. Zhao, J. Sun and Z. Song, *Desalination*, 2023, **550**, 116373.
- 9 N. Chang, Z. Gu and X. Yan, *J. Am. Chem. Soc.*, 2010, **132**, 13645–13647.
- 10 K. Chen, P. Wang, A. Gu, E. Miensah, C. Gong, P. Mao, Y. Jiao, K. Chen, Y. Liu and Y. Yang, *Microporous Mesoporous Mater.*, 2022, **339**, 111983.
- 11 W. Chi, S. Hwang, S. Lee, S. Park, Y. Bae, D. Ryu, J. Kim and J. Kim, *J. Membr. Sci.*, 2015, **495**, 479–488.
- 12 M. Chin, C. Cisneros, S. Araiza, K. Vargas, K. Ishihara and F. Tian, *RSC Adv.*, 2018, **8**, 26987–26997.
- 13 K. Cho, H. An, X. Do, K. Choi, H. Yoon, H. Jeong, J. Lee and K. Baek, *J. Mater. Chem. A*, 2018, **6**, 18912–18919.
- 14 A. Chowdhuri, B. Das, A. Kumar, S. Tripathy, S. Roy and S. Sahu, *Nanotechnology*, 2017, **28**, 095102.
- 15 J. Cravillon, S. Münzer, S. Lohmeier, A. Feldhoff, K. Huber and M. Wiebcke, *Chem. Mater.*, 2009, **21**, 1410–1412.
- 16 J. Cravillon, R. Nayuk, S. Springer, A. Feldhoff, K. Huber and M. Wiebcke, *Chem. Mater.*, 2011, **23**, 2130–2141.
- 17 J. Cravillon, C. Schröder, R. Nayuk, J. Gummel, K. Huber and M. Wiebcke, *Angew. Chem.-Int. Ed.*, 2011, **50**, 8067–8071.
- 18 A. De, Y. Reddy, S. Paul, V. Sharma, V. Tippavajhala and J. Bhaumik, *Mol. Pharm.*, 2025, **22**, 827–839.
- 19 N. Demir, B. Topuz, L. Yilmaz and H. Kalipcilar, *Microporous Mesoporous Mater.*, 2014, **198**, 291–300.
- 20 Y. Ding, Y. Xu, B. Ding, Z. Li, F. Xie, F. Zhang, H. Wang, J. Liu and X. Wang, *Colloids Surf. Physicochem. Eng. Asp.*, 2017, **520**, 661–667.
- 21 K. Eum, K. Jayachandrababu, F. Rashidi, K. Zhang, J. Leisen, S. Graham, R. Lively, R. Chance, D. Sholl, C. Jones and S. Nair, *J. Am. Chem. Soc.*, 2015, **137**, 4191–4197.
- 22 X. Fan, J. Zhou, T. Wang, J. Zheng and X. Li, *RSC Adv.*, 2015, **5**, 58595–58599.
- 23 T. Gao, H. Li, F. Zhou, M. Gao, S. Liang and M. Luo, *Desalination*, 2019, **451**, 133–138.
- 24 W. He, X. Guo, J. Zheng, J. Xu, T. Hayat, N. Alharbi and M. Zhang, *Inorg. Chem.*, 2019, **58**, 7255–7266.
- 25 K. Heinz, S. Rogge, A. Kalytta-Mewes, D. Volkmer and H. Bunzen, *Inorg. Chem. Front.*, 2023, **10**, 4763–4772.
- 26 T. Imae, A. Rahmawati, A. Berhe and M. Kebede, *ACS Appl. Nano Mater.*, 2022, **5**, 16842–16852.
- 27 S. Jampa, A. Unnarkat, R. Vanshpati, S. Pandian, M. Sinha and S. Dharaskar, *Environ. Technol. Innov.*, 2020, **19**, 100927.
- 28 A. Jana, A. Vijayalakshmi, S. Raghunathan, A. Shankar, K. Sainath and A. Modi, *Colloids Surf. C Environ. Asp.*, 2024, **2**, 100030.
- 29 M. Jian, B. Liu, R. Liu, J. Qu, H. Wang and X. Zhang, *RSC Adv.*, 2015, **5**, 48433–48441.
- 30 J. Jiang, C. Yang and X. Yan, *ACS Appl. Mater. Interfaces*, 2013, **5**, 9837–9842.
- 31 Y. Jiang, H. Liu, X. Tan, L. Guo, J. Zhang, S. Liu, Y. Guo, J. Zhang, H. Wang and W. Chu, *ACS Appl. Mater. Interfaces*, 2017, **9**, 25239–25249.

- 32 X. Jiang, S. He, G. Han, J. Long, S. Li, C. Lau, S. Zhang and L. Shao, *ACS Appl. Mater. INTERFACES*, 2021, **13**, 11296–11305.
- 33 A. Jomekian, R. Behbahani, T. Mohammadi and A. Kargari, *J. Nat. Gas Sci. Eng.*, 2016, **31**, 562–574.
- 34 A. Jomekian, B. Bazooyar, R. Behbahani, T. Mohammadi and A. Kargari, *J. Membr. Sci.*, 2017, **524**, 652–662.
- 35 A. Karimi, A. Khataee, V. Vatanpour and M. Safarpour, *Sep. Purif. Technol.*, 2019, **229**, 115838.
- 36 S. Kawada, T. Otsubo, T. Horie, Y. Komoda, N. Ohmura, H. Asano, R. Hidema, H. Suzuki, K. Taniya, Y. Ichihashi and S. Nishiyama, *CrystEngComm*, 2022, **24**, 7378–7386.
- 37 I. Khay, G. Chaplais, H. Nouali, C. Marichal and J. Patarin, *RSC Adv.*, 2015, **5**, 31514–31518.
- 38 K. Kida, M. Okita, K. Fujita, S. Tanaka and Y. Miyake, *CrystEngComm*, 2013, **15**, 1794–1801.
- 39 J. Kim, S. Moon, H. Wang, S. Kim and Y. Lee, *J. Membr. Sci.*, 2019, **582**, 381–390.
- 40 S. Kim, J. Lee, J. Bae and J. Lee, *Nanomaterials*, 2024, **14**, 284.
- 41 O. Kolmykov, N. Chebbat, J. Commenge, G. Medjandi and R. Schneider, *Tetrahedron Lett.*, 2016, **57**, 5885–5888.
- 42 W. Kong, M. Serdechnova, V. Kasneryk, D. Gao, H. Wang, X. Xie, C. Blawert, M. Zheludkevich and Y. Zhang, *Surf. Coat. Technol.*, 2024, **483**, 130812.
- 43 S. Kulkarni, A. Pandey, A. Nikam, S. Nannuri, S. George, S. Fayaz, A. Vincent and S. Mutalik, *Int. J. Biol. Macromol.*, 2021, **178**, 444–463.
- 44 G. Kumari, K. Jayaramulu, T. Maji and C. Narayana, *J. Phys. Chem. A*, 2013, **117**, 11006–11012.
- 45 L. Lai, Y. Yeong, N. Ani, K. Lau and A. Shariff, *Part. Sci. Technol.*, 2014, **32**, 520–528.
- 46 Q. Lai, Y. Zhao, Y. Liang, J. He and J. Chen, *Adv. Funct. Mater.*, 2016, **26**, 8334–8344.
- 47 Q. Lai, L. Zheng, Y. Liang, J. He, J. Zhao and J. Chen, *ACS Catal.*, 2017, **7**, 1655–1663.
- 48 T. Lee, H. Kim, W. Cho, D. Han, M. Ridwan, C. Yoon, J. Lee, N. Choi, K. Ha, A. Yip and J. Choi, *J. Phys. Chem. C*, 2015, **119**, 8226–8237.
- 49 J. Lee, D. Kim, H. Shin, S. Yoo, H. Kwon and J. Kim, *J. Ind. Eng. Chem.*, 2019, **72**, 374–379.
- 50 T. Lee, J. Oh, S. Hong, J. Lee, S. Roh, S. Kim and H. Park, *J. Membr. Sci.*, 2019, **570**, 23–33.
- 51 J. Li, Y. Wu, Z. Li, B. Zhang, M. Zhu, X. Hu, Y. Zhang and F. Li, *J. Phys. Chem. C*, 2014, **118**, 27382–27387.
- 52 H. Li, D. Fu, X. Zhang, G. Han and F. Zhang, *ChemistrySelect*, 2017, **2**, 7530–7534.
- 53 X. Li, C. Hao, B. Tang, Y. Wang, M. Liu, Y. Wang, Y. Zhu, C. Lu and Z. Tang, *Nanoscale*, 2017, **9**, 2178–2187.
- 54 Y. Li, J. Kim, J. Wang, N. Liu, Y. Bando, A. Alshehri, Y. Yarnauchi, C. Hou and K. Wu, *Nanoscale*, 2018, **10**, 14852–14859.
- 55 P. Li, J. Li, X. Feng, J. Li, Y. Hao, J. Zhang, H. Wang, A. Yin, J. Zhou, X. Ma and B. Wang, *Nat. Commun.*, 2019, **10**, 2177.
- 56 Y. Li, J. Henzie, T. Park, J. Wang, C. Young, H. Xie, J. Yi, J. Li, M. Kim, J. Kim, Y. Yamauchi and J. Na, *Bull. Chem. Soc. Jpn.*, 2020, **93**, 176–181.
- 57 N. Li, Z. Wang, M. Wang, M. Gao, H. Wu, S. Zhao and J. Wang, *J. Membr. Sci.*, 2021, **624**, 119095.
- 58 Y. Li, Z. Lin, X. Wang, Z. Duan, P. Lu, S. Li, D. Ji, Z. Wang, G. Li, D. Yu and W. Liu, *Sep. Purif. Technol.*, 2021, **270**, 118794.
- 59 T. Li, Y. Wang, X. Wang, C. Cheng, K. Zhang, J. Yang, G. Han, Z. Wang, X. Wang and L. Wang, *Membranes*, 2022, **12**, 122.
- 60 J. Li, Y. Hua, Y. Gao, S. Li, T. Kedzierski, E. Mijowska, P. Chu, R. Holze, Y. He, W. Bi and X. Chen, *SMALL*, 2024, **20**, 2406187.
- 61 O. Linder-Patton, T. de Prinse, S. Furukawa, S. Bell, K. Sumida, C. Doonan and C. Sumby, *CrystEngComm*, 2018, **20**, 4926–4934.

- 62 X. Liu, Y. Li, Y. Ban, Y. Peng, H. Jin, H. Bux, L. Xu, J. Caro and W. Yang, *Chem. Commun.*, 2013, **49**, 9140–9142.
- 63 Q. Liu, Z. Low, L. Li, A. Razmjou, K. Wang, J. Yao and H. Wang, *J. Mater. Chem. A*, 2013, **1**, 11563–11569.
- 64 D. Liu, X. Ma, H. Xi and Y. Lin, *J. Membr. Sci.*, 2014, **451**, 85–93.
- 65 G. Liu, Y. Xu, Y. Han, J. Wu, J. Xu, H. Meng and X. Zhang, *Dalton Trans.*, 2017, **46**, 2114–2121.
- 66 Y. Luo, S. Fan, W. Yu, Z. Wu, D. Cullen, C. Liang, J. Shi and C. Su, *Adv. Mater.*, 2018, **30**, 1704576.
- 67 C. Luo, F. Fu, X. Yang, J. Wei, C. Wang, J. Zhu, D. Huang, D. Astruc and P. Zhao, *ChemCatChem*, 2019, **11**, 1643–1649.
- 68 J. McEwen, J. Hayman and A. Yazaydin, *Chem. Phys.*, 2013, **412**, 72–76.
- 69 A. Mittal, S. Gandhi and I. Roy, *Sci. Rep.*, 2022, **12**, 10331.
- 70 A. Mohammadi, E. Jafarpour, K. Mirzaei, A. Shojaei, P. Jafarpour, M. Eyni, S. Mirzaei and H. Molavi, *ACS Appl. Mater. Interfaces*, 2024, **16**, 3862–3875.
- 71 D. Muñoz-Gil and F. Figueiredo, *Nanomaterials*, 2019, **9**, 1369.
- 72 Q. Nguyen, K. Jeong, Y. Lee and K. Baek, *J. COsub2sub Util.*, 2023, **70**, 102451.
- 73 M. Nie, S. Lu, D. Lei, C. Yang and Z. Zhao, *J. Electrochem. Soc.*, 2017, **164**, H952–H957.
- 74 Y. Pan, Y. Liu, G. Zeng, L. Zhao and Z. Lai, *Chem. Commun.*, 2011, **47**, 2071–2073.
- 75 S. Pandey, B. Sharmah, P. Manna, Z. Chawngthu, S. Kumar, A. Trivedi, S. Saha and J. Das, *J. Mol. Struct.*, 2024, **1312**, 138452.
- 76 J. Patterson, P. Abellan, M. Denny, C. Park, N. Browning, S. Cohen, J. Evans and N. Gianneschi, *J. Am. Chem. Soc.*, 2015, **137**, 7322–7328.
- 77 S. Qin, X. Du, K. Wang, D. Wang, J. Zheng, H. Xu, X. Wei and Y. Yuan, *Int. J. Pharm.*, 2023, **642**, 123167.
- 78 J. Qiu, X. Xu, B. Liu, Y. Guo, H. Wang, L. Yu, Y. Jiang, C. Huang, B. Fan, Z. Zeng and L. Li, *ChemistrySelect*, 2022, **7**, 202203273.
- 79 S. Saghir and Z. Xiao, *Mater. Res. Bull.*, 2021, **141**, 111372.
- 80 A. Schejn, L. Balan, V. Falk, L. Aranda, G. Medjahdi and R. Schneider, *CrystEngComm*, 2014, **16**, 4493–4500.
- 81 P. Schneider, K. Kollmannsberger, C. Cesari, R. Khare, M. Boniface, B. Cuenya, T. Lunkenbein, M. Elsner, S. Zacchini, A. Bandarenka, J. Warnan and R. Fischer, *Chemelectrochem*, 2024, **11**, 202300476.
- 82 H. Seo, J. Kang, H. Kim, S. Jang, J. Kim, S. Choi, H. Eom, O. Kwon, J. Shin, J. Park, D. Yoo, S. Jeong, S. Noh, C. Park, M. Seol, S. Park and I. Nam, *Korean J. Chem. Eng.*, 2025, **42**, 1529–1538.
- 83 H. Seo, Y. Lee, H. Kim, S. Jang, J. Kim, J. Kang, H. Eom, O. Kwon, J. Shin, J. Park, S. Choi, Y. Bae, C. Park, M. Seol, H. Song, S. Park and I. Nam, *J. Alloys Compd.*, 2025, **1013**, 178578.
- 84 S. Sharma, P. Utpalla, J. Bahadur, A. Das, J. Prakash and P. Pujari, *J. Phys. Chem. C*, 2020, **124**, 25291–25298.
- 85 H. Shen, H. Zhao, E. Benassi, L. Chou and H. Song, *CrystEngComm*, 2023, **25**, 3308–3316.
- 86 J. Shi, X. Wang, S. Zhang, L. Tang and Z. Jiang, *J. Mater. Chem. B*, 2016, **4**, 2654–2661.
- 87 Y. Si, X. Li, G. Yang, X. Mie and L. Ge, *J. Mater. Sci.*, 2020, **55**, 13049–13061.
- 88 Y. Song, S. Han, S. Liu, R. Sun, L. Zhao and C. Yan, *ACS Appl. Mater. Interfaces*, 2023, **15**, 25339–25353.
- 89 J. Sánchez-Láinez, B. Zornoza, S. Friebe, J. Caro, S. Cao, A. Sabetghadam, B. Seoane, J. Gascon, F. Kapteijn, C. Le Guillouzer, G. Clet, M. Daturi, C. Téllez and J. Coronas, *J. Membr. Sci.*, 2016, **515**, 45–53.
- 90 D. Ta, H. Nguyen, B. Trinh, Q. Le, H. Ta and H. Nguyen, *Can. J. Chem. Eng.*, 2018, **96**, 1518–1531.
- 91 S. Tanaka, K. Kida, M. Okita, Y. Ito and Y. Miyake, *Chem. Lett.*, 2012, **41**, 1337–1339.
- 92 S. Tanaka, K. Fujita, Y. Miyake, M. Miyamoto, Y. Hasegawa, T. Makino, S. Van der Perre, J. Saint Remi, T. Van Assche, G. Baron and J. Denayer, *J. Phys. Chem. C*, 2015, **119**, 28430–28439.
- 93 A. Thomas, P. Immanuel, N. Prasad, A. Goldreich, J. Prilusky, R. Carmieli and L. Yadgarov, *Nanoscale Adv.*, 2025, **7**, 3764–3777.

- 94 T. Tian, M. Wharmby, J. Parra, C. Ania and D. Fairen-Jimenez, *Dalton Trans.*, 2016, **45**, 6893–6900.
- 95 N. Torad, M. Hu, Y. Kamachi, K. Takai, M. Imura, M. Naito and Y. Yamauchi, *Chem. Commun.*, 2013, **49**, 2521–2523.
- 96 N. Tran, J. Ki and M. Othman, *Sep. Purif. Technol.*, 2020, **233**, 116026.
- 97 C. Tsai and E. Langner, *Microporous Mesoporous Mater.*, 2016, **221**, 8–13.
- 98 S. Van Cleuvenbergen, I. Stassen, E. Gobechiya, Y. Zhang, K. Markey, D. De Vos, C. Kirschhock, B. Champagne, T. Verbiest and M. van der Veen, *Chem. Mater.*, 2016, **28**, 3203–3209.
- 99 S. Venna, J. Jasinski and M. Carreon, *J. Am. Chem. Soc.*, 2010, **132**, 18030–18033.
- 100 Z. Wang, T. Yan, J. Fang, L. Shi and D. Zhang, *J. Mater. Chem. A*, 2016, **4**, 10858–10868.
- 101 H. Wang, Y. Wang, A. Jia, C. Wang, L. Wu, Y. Yang and Y. Wang, *Catal. Sci. Technol.*, 2017, **7**, 5572–5584.
- 102 Z. Wang, H. Jin, T. Meng, K. Liao, W. Meng, J. Yang, D. He, Y. Xiong and S. Mu, *Adv. Funct. Mater.*, 2018, **28**, 1802596.
- 103 J. Wang, G. Han, L. Wang, L. Du, G. Chen, Y. Gao, Y. Ma, C. Du, X. Cheng, P. Zuo and G. Yin, *Small*, 2018, **14**, 1704282.
- 104 F. Wang, T. Zheng, R. Xiong, P. Wang and J. Ma, *Chemosphere*, 2019, **233**, 524–531.
- 105 J. Wang, X. Zhao, H. Qu, J. Xu and J. Ma, *Appl. Surf. Sci.*, 2023, **615**, 156181.
- 106 M. Weber, T. Baker, B. Dao, C. Kwon and F. Tian, *Cryst. Growth Des.*, 2020, **20**, 2305–2312.
- 107 Y. Xue, Y. Liu, C. Wang and Y. Yao, *J. Inorg. Organomet. Polym. Mater.*, 2024, **34**, 6159–6167.
- 108 M. Yahia, Q. Le, N. Ismail, M. Essalhi, O. Sundman, A. Rahimpour, M. Dal-Cin and N. Tavajohi, *Microporous Mesoporous Mater.*, 2021, **312**, 110761.
- 109 R. Yang, X. Yan, Y. Li, X. Zhang and J. Chen, *ACS Appl. Mater. Interfaces*, 2017, **9**, 42482–42491.
- 110 H. Yang, X. Guo, R. Chen, Q. Liu, J. Liu, J. Yu, C. Lin, J. Wang and M. Zhang, *Eur. Polym. J.*, 2021, **144**, 110212.
- 111 H. Yin, H. Kim, J. Choi and A. Yip, *Chem. Eng. J.*, 2015, **278**, 293–300.
- 112 C. Zhang, R. Lively, K. Zhang, J. Johnson, O. Karvan and W. Koros, *J. Phys. Chem. Lett.*, 2012, **3**, 2130–2134.
- 113 K. Zhang, R. Lively, C. Zhang, R. Chance, W. Koros, D. Sholl and S. Nair, *J. Phys. Chem. Lett.*, 2013, **4**, 3618–3622.
- 114 L. Zhang, Z. Su, F. Jiang, L. Yang, J. Qian, Y. Zhou, W. Li and M. Hong, *Nanoscale*, 2014, **6**, 6590–6602.
- 115 C. Zhang, J. Gee, D. Sholl and R. Lively, *J. Phys. Chem. C*, 2014, **118**, 20727–20733.
- 116 W. Zhang, Z. Wu, H. Jiang and S. Yu, *J. Am. Chem. Soc.*, 2014, **136**, 14385–14388.
- 117 H. Zhang, W. Jiang, R. Liu, J. Zhang, D. Zhang, Z. Li and Y. Luan, *ACS Appl. Mater. Interfaces*, 2017, **9**, 19687–19697.
- 118 M. Zhang, X. Shi, X. Dai, C. Huo, J. Xie, X. Li and X. Wang, *J. Mater. Sci.*, 2018, **53**, 7083–7093.
- 119 H. Zhang, M. Zhao and Y. Lin, *Microporous Mesoporous Mater.*, 2019, **279**, 201–210.
- 120 H. Zhang, M. Zhao, Y. Yang and Y. Lin, *Microporous Mesoporous Mater.*, 2019, **288**, 109568.
- 121 Q. Zhang, C. Tang, M. Han, Z. Tong, L. Cao, S. Dong, Y. Yang, J. Li, X. Cao, J. Zhang, K. Wang and S. Zhang, *ACS Appl. Polym. Mater.*, 2025, **7**, 7113–7121.
- 122 Y. Zhao, Y. Pan, W. Liu and L. Zhang, *Chem. Lett.*, 2015, **44**, 758–760.
- 123 H. Zheng, Y. Zhang, L. Liu, W. Wan, P. Guo, A. Nyström and X. Zou, *J. Am. Chem. Soc.*, 2016, **138**, 962–968.
- 124 J. Zhou, X. Yu, X. Fan, X. Wang, H. Li, Y. Zhang, W. Li, J. Zheng, B. Wang and X. Li, *J. Mater. Chem. A*, 2015, **3**, 8272–8275.

- 125 L. Zhou, H. Li, D. Wang, W. Jiang, Y. Wu, L. Shang, C. Guo, C. Liu and B. Ren, *Electroanalysis*, 2023, **35**, 291–301.
- 126 M. Zhu, S. Venna, J. Jasinski and M. Carreon, *Chem. Mater.*, 2011, **23**, 3590–3592.
- 127 M. Zhu, D. Srinivas, S. Bhogeswararao, P. Ratnasamy and M. Carreon, *Catal. Commun.*, 2013, **32**, 36–40.
- 128 Y. Zhu, J. Ciston, B. Zheng, X. Miao, C. Czarnik, Y. Pan, R. Sougrat, Z. Lai, C. Hsiung, K. Yao, I. Pinnau, M. Pan and Y. Han, *Nat. Mater.*, 2017, **16**, 532-+.
- 129 Q. Zhu, W. Zhuang, Y. Chen, Z. Wang, B. Hernandez, J. Wu, P. Yang, D. Liu, C. Zhu, H. Ying and Z. Zhu, *ACS Appl. Mater. Interfaces*, 2018, **10**, 16066–16076.
- 130 R. Zhu, L. Wang, H. Zhang, C. Liu and Z. Wang, *Sep. Purif. Technol.*, 2024, **335**, 126209.
- 131 N. J. van Eck and L. Waltman, *Scientometrics*, 2010, **84**, 523–538.
